# Supplementary material for: Digital PCR for Genotype Quantification: A Case Study in a Pasta Production Chain
Source: MDPI journal article supplement (doi:10.3390/biology10050419), 2021-05-09
Supplement: s1 [file s1]

>[gnl|Td Svvo|whe Td AB Svevo 7B](#)

Length = 722970987

Score = 1019 bits (514), Expect = 0.0  
Identities = 604/633 (95%), Gaps = 2/633 (0%)  
Strand = Plus / Plus

Query: 323 gagctcgtgcgctccctcggccgcttgccgtccgcgaccaccgcgatggtcgacgccacc  
||||||| |||||||  
Sbjct: 533407836 gagctcgtccgctccctcggccgcttgccgtccgcgaccaccgcgatggtcgacgccacc

Query: 383 acttcctcaggtatgtggaagctactcaattacagtctacagtacaatcagtcactgcag  
|| |||||||  
Sbjct: 533407896 acctcctcaggtatgtggtagctactcaattacagtctacagtaaaatcagtccttcgag

Query: 443 tactgcactactgcaccattcaggacgctgacgccgacgggggtgtgtttgcaggcgaagg  
||| |||||||  
Sbjct: 533407956 taccgcactactgcaccattcaggcggctgatgccgacgg--tgtgtttgcaggcgaggg

Query: 503 ggacgggaggtttccgccggagctgagcctggaggccgtgttcgggtgcgtgcggatagg  
|||||||  
Sbjct: 533408014 ggacgggaggtttccgccggagctgagcctggaggccgtgttcgggtgcgtgcggatagg

Query: 563 gccggtggacgagccggacgcggagttcgcgtaccagacggcgggtgagcatcggggggca  
|||||||  
Sbjct: 533408074 gccggtggacgagccggacgcggagttcgcgtaccagacagcgggtgagcatcggggggca

Query: 623 cacgttcaaggggatcctgcgggaccatgggcccggcggaagaggcggctgggcagctgcc  
|||||||  
Sbjct: 533408134 cacgttcaaggggatcctgcgcgaccatgggcccggcggaagaggcggctgggcagctgcc

Query: 683 gccgtcctcggcggagtaccaccagctgacaggggccgcgagggaggggtcatcgccggc  
||||| || | |||||||  
Sbjct: 533408194 gccgtcgtcaggggagtaccacgagctgacaggagccgcgagggaggggtcatcgccggc

Query: 743 cgggagcagcgaggcggccggggggcacggagcgacgggtggcgacgtccgcggcggtgct  
|||||||  
Sbjct: 533408254 cgggagcagcgaggcggccggggggcacggggcgacgggtggcgacgtctgcggcggtgct

Query: 803 catggaccctacccgacgccgatcggcgccttcgcagcaggcaccagttcttccctca  
|||||||  
Sbjct: 533408314 catggaccctacccgacgccgatcggcgccttcgcagcaggcaccagttcttccctca

Query: 863 taaccctagaacctagcttcaattcctgccatgaattcctagcaagtttcatttactgcc  
|||||||  
Sbjct: 533408374 taaccctagaacctagcttcaattcctgccatgaattccttgcaagtttcatttactgcc

Query: 923 aaagatgatggtcgagttgcattgatccaagtc 955  
||||||| | |||||||  
Sbjct: 533408434 aaagatggcgaccgagttgcatttatccaagtc 533408466

**Figure S1.** Alignment of a 630 bp fragment (from 323 to 955 of the SNP12876 sequence) showing 95% identity with a region of chromosome 7B. SNP 12876 is green highlighted.
